# Supplementary material for: One-pot synthesis of silicon carbide from a non-formalin iminosilane-resorcinol composite
Source: Royal Society of Chemistry journal article supplement (doi:10.1039/d4nj01115e), 2024-01-01
Supplement: d4nj01115e1.pdf [file d4nj01115e1.pdf]

## Supporting information

### One-Pot Synthesis of Silicon Carbide from a Non-Formalin Iminosilane-Resorcinol Composite

N. Mohanapriya<sup>a,b</sup> and Naveen Chandrasekaran<sup>a,\*</sup>

<sup>a</sup> *Electroplating and Metal Finishing Division, CSIR-Central Electrochemical Research Institute, Karaikudi-630003, TamilNadu, India.*

<sup>b</sup> *Academy of Scientific and Innovative Research (AcSIR), Ghaziabad- 201002, India.*

\*Email: [naveenumr@gmail.com](mailto:naveenumr@gmail.com), [naveen@cecri.res.in](mailto:naveen@cecri.res.in)

### Table of contents

- Figure S1.** Schematic representation of the synthesis of SiC using iminosilane resorcinol (ISR) composite by carbothermal reduction.
- Figure S2.** FTIR of Iminosilane resorcinol (ISR).
- Figure S3.** XPS survey spectrum and deconvoluted high-resolution C 1s, N 1s, and Si 2p spectra.
- Figure S4.** XRD pattern of Iminosilane resorcinol (ISR).
- Figure S5.** XRD pattern of ISR pyrolyzed samples at different temperatures (1000, 1200 1350 and 1500 °C).
- Figure S6.** FESEM images of (a, b) ISR-1000, (c, d) ISR-1200, (e, f) ISR-1350, (g, h) ISR-1500 and (i, j) ISR-1500-600 at different magnifications (0.5 μm and 100 nm).
- Figure S7.** HRTEM image of ISR-1500 (SiC-C) (b) SEAD pattern, (c) lattice fringes, (d-f) HAADF with high resolution elemental mapping of Si and C.
- Figure S8.** UV-DRS spectra of ISR-1500-600 (SiC).
- Figure S9.** BET isotherms of (a) ISR-1500(SiC-C) and (b) ISR-1500-600 (SiC) and corresponding BJH desorption plots (inset).
- Table S1.** Comparison of SiC precursors and surface area.

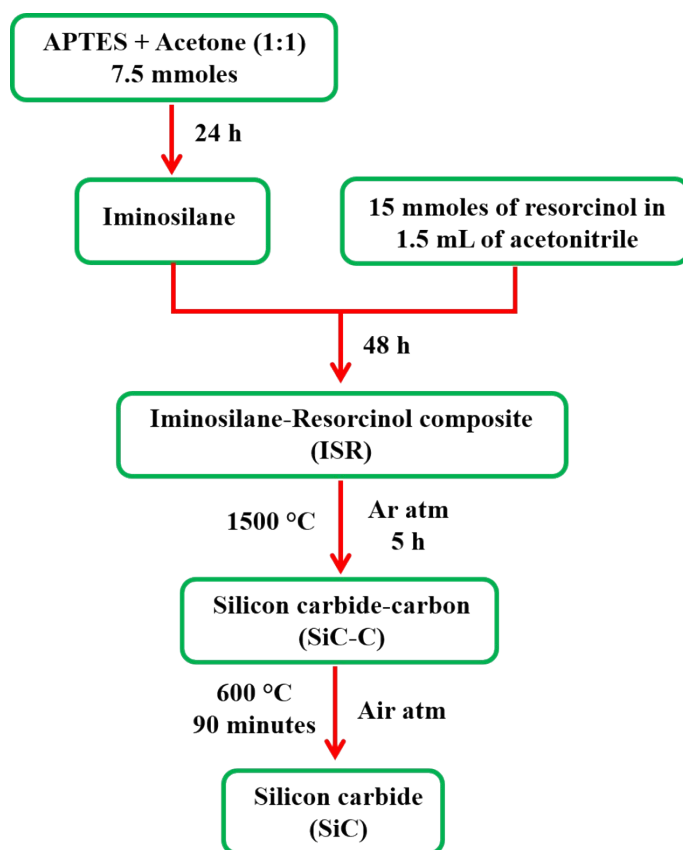

Figure S1. Schematic representation of the synthesis of SiC using iminosilane resorcinol (ISR) composite by carbothermal reduction.

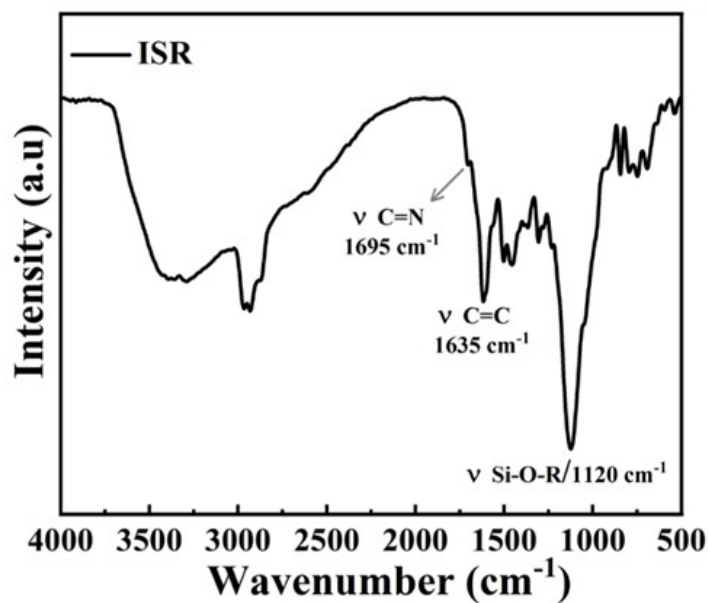

Figure S2. FTIR of Iminosilane resorcinol (ISR).

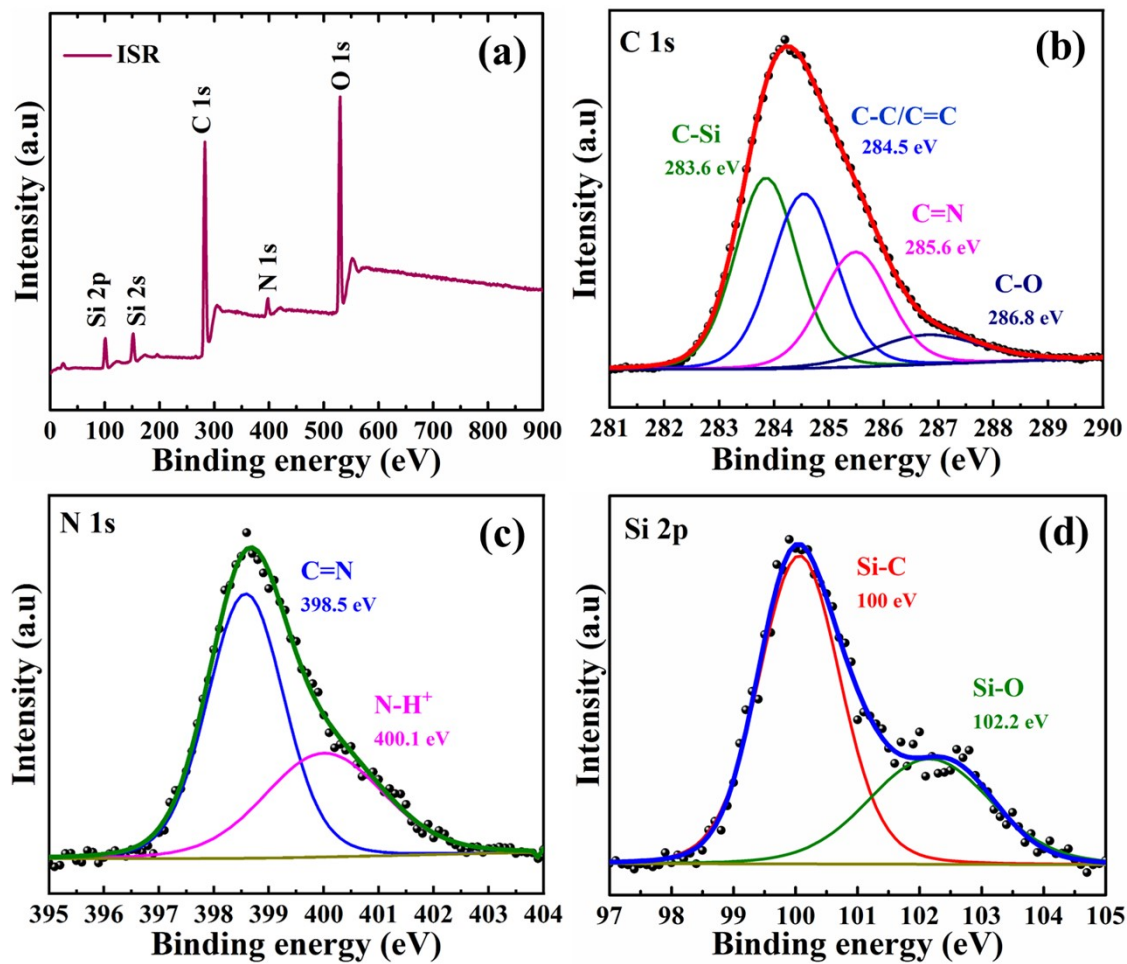

Figure S3. (a) XPS survey spectrum and (b-d) deconvoluted high-resolution C 1s, N 1s, and Si 2p spectra.

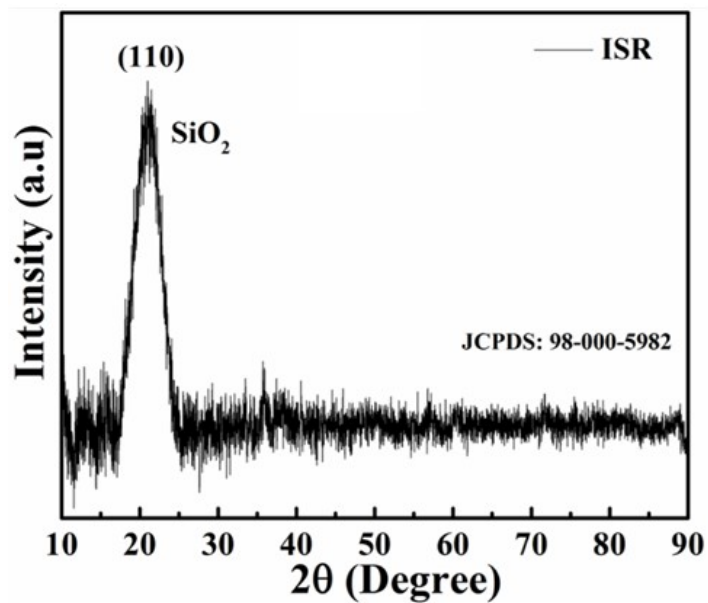

Figure S4. XRD pattern of Iminosilane resorcinol (ISR).

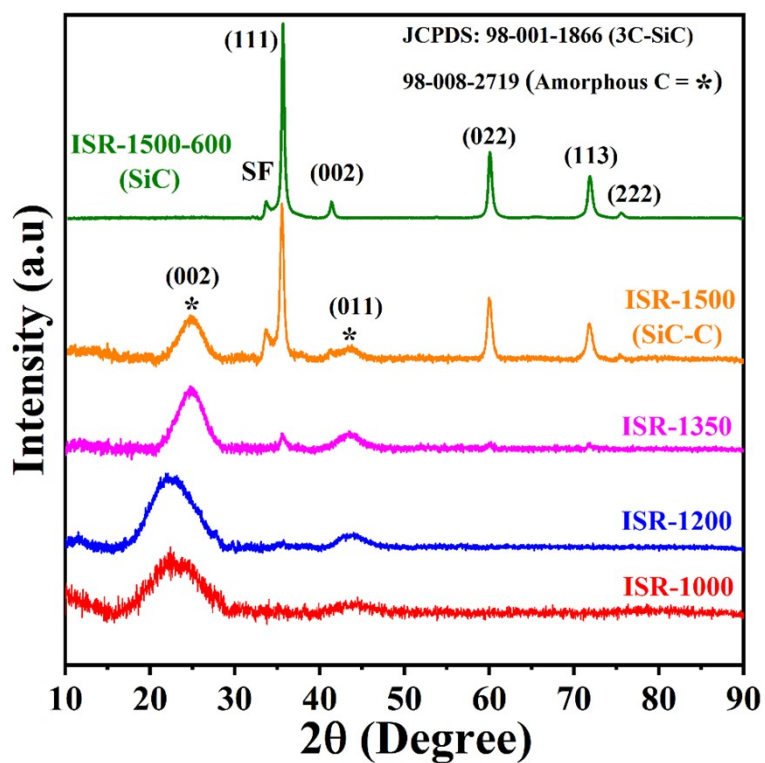

Figure S5. XRD pattern of ISR pyrolyzed samples at different temperatures (1000, 1200 1350 and 1500 °C).

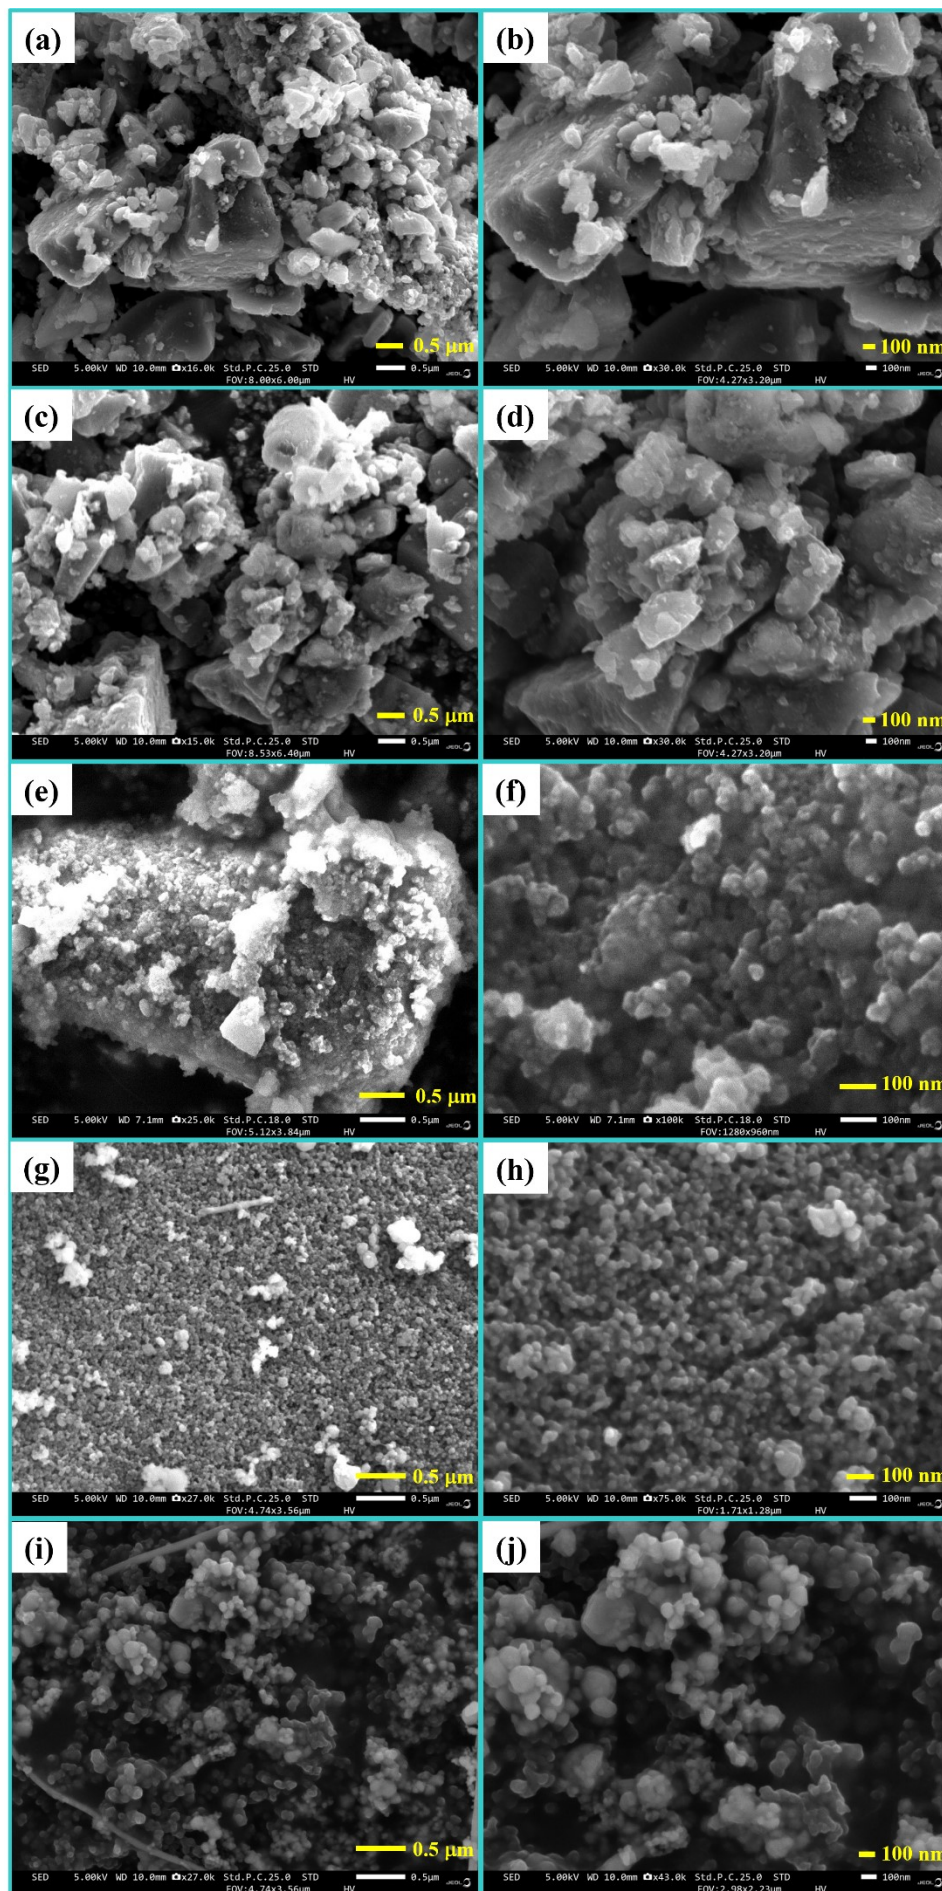

Figure S6. FESEM images of (a, b) ISR-1000, (c, d) ISR-1200, (e, f) ISR-1350, (g, h) ISR-1500 and (i, j) ISR-1500-600 at different magnifications (0.5 μm and 100 nm).

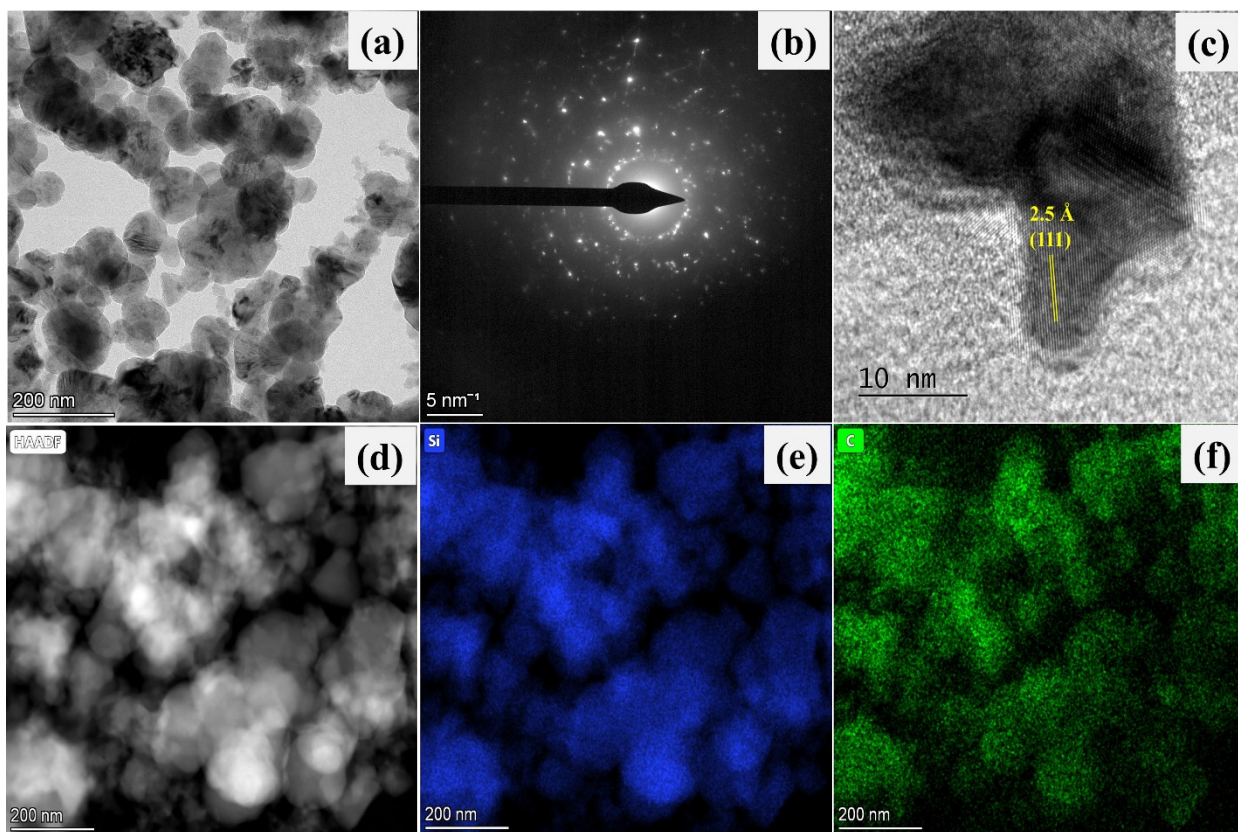

Figure S7. HRTEM image of ISR-1500 (SiC-C) (b) SEAD pattern, (c) lattice fringes, (d-f) HAADF with high resolution elemental mapping of Si and C.

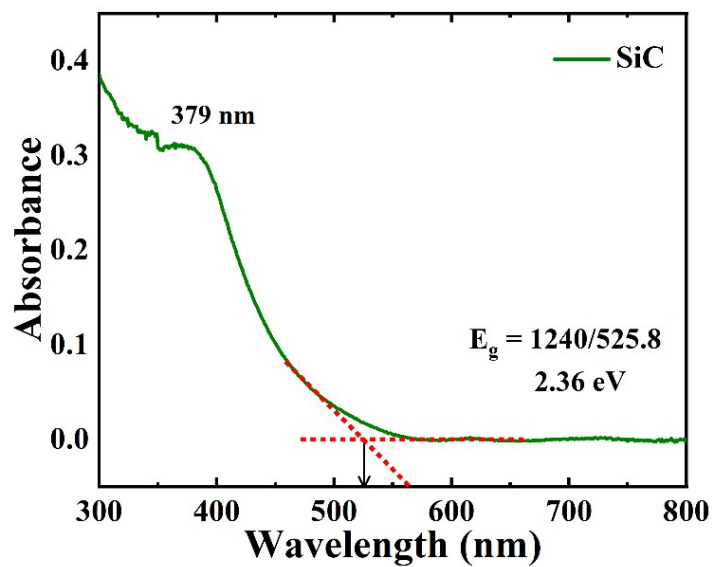

Figure S8. UV-DRS spectra of ISR-1500-600 (SiC).

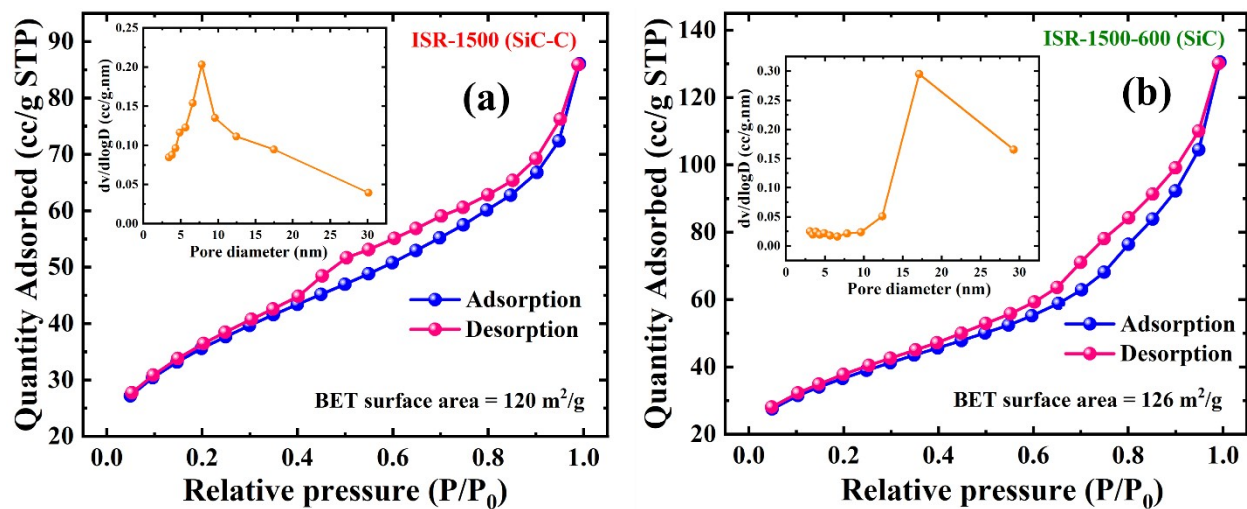

Figure S9. BET isotherms of (a) ISR-1500(SiC-C) and (b) ISR-1500-600 (SiC) and corresponding BJH desorption plots (inset).

| S. No | Precursors                            |                                       | Surface area (m <sup>2</sup> /g) | References                                                          |
|-------|---------------------------------------|---------------------------------------|----------------------------------|---------------------------------------------------------------------|
|       | Si source                             | C source                              |                                  |                                                                     |
| 1     | SiO <sub>2</sub>                      | Carbon powder                         | 0.2 – 2.8                        | Journal of the American Ceramic Society, 1983, 66.7, c111-c113.     |
| 2     | Tetramethylsilane                     | Carbon powder                         | 34                               | Applied Catalysis. 1986, 20, 91-107.                                |
| 3     | SiO Vapor                             | Activated carbon                      | ~ 60                             | Journal of catalysis. 1988, 114, 176-185.                           |
| 4     | SiO <sub>2</sub>                      | Activated carbon                      | 30                               | Applied Catalysis A: General. 1998, 167.2, 321-330                  |
| 5     | silicon powder                        | MWCNT                                 | 60                               | Key Eng. Mater. 2008, 368, 647.                                     |
| 6     | SiO <sub>2</sub> sphere templates     | Polycarbosilane                       | 619                              | Journal of Materials Chemistry. 2004 14.23, 3436-3439.              |
| 7     | Phenyltrimethoxysilane                | Phenyltrimethoxysilane                | 450                              | Industrial & engineering chemistry research. 2004, 43.16, 4732-4739 |
| 8     | Orthosilicate                         | Resorcinol-formaldehyde (RF) Aerogels | 232                              | Microporous and Mesoporous Materials, 2012, 149, 16-24.             |
| 9     | SiO <sub>2</sub> Aerogels             | RF Aerogels                           | 251                              | Materials Letters. 2013, 99, 108-110                                |
| 10    | Orthosilicate Aerogels                | RF Aerogels                           | 328                              | Ceramics international. 2014, 40.6, 8265-8271.                      |
| 11    | 3-aminopropyl triethoxysilane (APTES) | Resorcinol (without formaldehyde)     | 126                              | This work                                                           |

**Table S1. Comparison of SiC precursors and surface area.**
